# Supplementary material for: Feeding Strategy to Use Beef Tallow and Modify Farmed Tiger Puffer Fatty Acid Composition
Source: MDPI journal article supplement (doi:10.3390/ani13193037), 2023-09-27
Supplement: s1 [file s1]

**Supplementary Table S1** Primers information for the qPCR study on mtDNA and lipid metabolism-related genes in this work

| Primer                | Sequence (5'-3')       | GenBank reference | PL (bp) |
|-----------------------|------------------------|-------------------|---------|
| mtDNA                 |                        |                   |         |
| 16S rRNA-F            | ATGTGGACCTGTATGAATGGC  | NC_004299.1       | 119     |
| 16S rRNA-R            | CTCCATAGGGTCTTCTCGTCTT |                   |         |
| CTYB-F                | CCTCCTGGGCTTCACAATCA   | NC_004299.1       | 123     |
| CTYB-R                | TTAATGTGGGCGGGGGTAAC   |                   |         |
| lipid metabolism gene |                        |                   |         |
| Lipogenesis           |                        |                   |         |
| <i>acacβ</i> -F       | GAAAGGTTTGCTGTGCGACTA  | XM_011615767.1    | 154     |
| <i>acacβ</i> -R       | TTACATCAGCGACCATTTCAGT |                   |         |
| <i>fas</i> -F         | CTTTGCCGCTGTCAATCG     | XM_011619859.1    | 78      |
| <i>fas</i> -R         | TGTCTCAACCCATTTGTAGTCG |                   |         |
| β-oxidation           |                        |                   |         |
| <i>cpt-1</i> -F       | GGGGTTTGTGGTCAAGTTAGG  | XM_011607269.1    | 186     |
| <i>cpt-1</i> -R       | ATAGATCCGTGGCGCTCAT    |                   |         |
| <i>vlc</i> -qF        | CGCTGTTCTTGGTGTGGAC    | XM_003969871.3    | 276     |
| <i>vlc</i> -qR        | GAGATTTGCTGCGGATGTTG   |                   |         |
| <i>acox1</i> -qF      | GCACGGCATCGCAAGTAAC    | XM_029850253.1    | 145     |
| <i>acox1</i> -qR      | GAGATCGAAGGCATCCACC    |                   |         |
| <i>acox3</i> -qF      | GACTGTGGCTATCCGCTTCT   | XM_029839734.1    | 214     |
| <i>acox3</i> -qR      | TTCCTGTGCGTCACTCTTGT   |                   |         |
| <i>ehhadh</i> -qF     | GGCACAATGGGAAGAGGCATT  | XM_003961946.3    | 185     |
| <i>ehhadh</i> -qR     | TGGACGGTTTCGCTGTAGGTA  |                   |         |
| <i>acaa1</i> -qF      | GGACAACAGCAAAGCAAGAG   | XM_029849183.1    | 110     |
| <i>acaa1</i> -qR      | ACCAGAAAAAACAGCCAAAA   |                   |         |
| <i>acaa2</i> -qF      | ACGGGGGTGTTTTGAAGGA    | XM_003975006.3    | 159     |

|                          |                        |                |     |
|--------------------------|------------------------|----------------|-----|
| <i>acaa2-qR</i>          | CATGACGGGCAATGTAGGG    |                |     |
| <i>dgat1-F</i>           | TGGTTTGTGAGCCGTTTCC    |                |     |
| <i>dgat1-R</i>           | CTGGCATTCGTTTGACTTCG   | XM_003969352.2 | 185 |
| <i>mgat2a-F</i>          | AAAGGCTTCATTAAATTGGC   |                |     |
| <i>mgat2a-R</i>          | TGATGGCTTGTCTGTAGGG    | XM_003978609.3 | 223 |
| Hydrolysis of glycerides |                        |                |     |
| <i>atgl-F</i>            | CCAACCTCTACAGGGTCTCA   |                |     |
| <i>atgl-R</i>            | GTTTAGCAGCCCGTTCTTC    | XM_003967696.3 | 119 |
| <i>dagla-F</i>           | CTGTTGGTGGAGTTGGTGTATG |                |     |
| <i>dagla-R</i>           | ATCAGAGCACGGCTGGTAAT   | XM_011610175.1 | 72  |
| <i>hsl-F</i>             | CTCTTGCTATCGGTCTTGTGG  |                |     |
| <i>hsl-R</i>             | TTCTGGGTCAATGGCATACTT  | XM_011621066.1 | 113 |
| <i>mgll-F</i>            | CCATCCAGTCAAAGTGGGTCT  |                |     |
| <i>mgll-R</i>            | CATCAGCTGCATGCCGAA     | XM_003963030.2 | 110 |
| Lipid digestion          |                        |                |     |
| <i>bsal-F</i>            | TTGAAGATGACTGACCCCGA   |                |     |
| <i>bsal-R</i>            | GATGTCTGCTGCGTTGTGAA   | XM_003978375.2 | 162 |
| <i>lp-F</i>              | CGTTTTCTCCTGTTACCC     |                |     |
| <i>lp-R</i>              | GACTCGTCCTCATCCCCT     | XM_029832009.1 | 97  |
| Lipid transport          |                        |                |     |
| <i>lpl-F</i>             | AGGGTCCACATCCGCAAA     |                |     |
| <i>lpl-R</i>             | GTTTCTCCTTGCGGCTCAT    | NM_001305600.1 | 157 |
| <i>lipc-F</i>            | GCGGCTTCAACAGCAGTAA    |                |     |
| <i>lipc-R</i>            | GAGGTGCGCTATGTCTTTCC   | XM_011610357.1 | 215 |
| <i>fabp1-F</i>           | CCATCGGTCTCCCTGATGAAG  |                |     |
| <i>fabp1-R</i>           | TTGACCGTTACCTTCGGTCC   | XM_003974807.3 | 121 |
| <i>fabp10a-F</i>         | CTGTGACCAACTCCTTTACCAT |                |     |
| <i>fabp10a-R</i>         | TCTCTCCACCTTTGAGCTCCTG | XM_003965635.3 | 150 |

|                                                  |                        |                |     |
|--------------------------------------------------|------------------------|----------------|-----|
| <i>fatp1</i> -F                                  | ATTGCAGACACCACAGGGAG   | XM_003964742.3 | 219 |
| <i>fatp1</i> -R                                  | ATATCGTGACGCTCGTGCAT   |                |     |
| <i>apoa1</i> -F                                  | CGATGACGCCGAGTACAAA    | AB183289.1     | 104 |
| <i>apoa1</i> -R                                  | CGGTTATGGGAGAAACGCTA   |                |     |
| <i>apoa4</i> -F                                  | TGCTTTCTGGGACTATGTTGC  | NM_001078591.1 | 124 |
| <i>apoa4</i> -R                                  | GTTGACTTTGTCTGGCACTCTC |                |     |
| <i>apob100</i> -F                                | AGGGACATAGTCAAACCAAGGA | XM_011619944.1 | 127 |
| <i>apob100</i> -R                                | AGAACACGAAGGCTGGACAC   |                |     |
| <i>apoel</i> -F                                  | TATTCAGACCCGCACCTCA    | NM_001078592.1 | 201 |
| <i>apoel</i> -R                                  | ATTTCCTCCATCTTGTCCTCC  |                |     |
| <i>mttp</i> -F                                   | ATGCTAAGGGTCTGGTTCTGC  | XM_011612378.1 | 124 |
| <i>mttp</i> -R                                   | ATGTCAGTGCTGCCGATCTT   |                |     |
| Lipid metabolism-related transcriptional factors |                        |                |     |
| <i>srebf1</i> -F                                 | TTTCAGCATCCCACCTTCC    | XM_011603881.1 | 158 |
| <i>srebf1</i> -R                                 | GGTGAACCGTGAGGACAATA   |                |     |
| <i>ppara1</i> -F                                 | TCAGTAGTTTATGGGTGTTGG  | NM_001097630.1 | 119 |
| <i>ppara1</i> -R                                 | GCGTGGACTCCGTAGTGGTA   |                |     |
| <i>ppara2</i> -F                                 | CCAGAAGAAGAACCGCAACA   | NM_001097629.1 | 149 |
| <i>ppara2</i> -R                                 | CCTCTTTCTCCACCATCTTGTT |                |     |
| <i>pparβ</i> -F                                  | AGCTGGAATACGACCGATGT   | AB275887.1     | 249 |
| <i>pparβ</i> -R                                  | TCTTCAGGTAGGCGGAGTTG   |                |     |
| <i>pparγ</i> -F                                  | CGCTGTCCCGACATCTGTAT   | NM_001097627.1 | 146 |
| <i>pparγ</i> -R                                  | GAACTGCTCGCCTTCCATT    |                |     |
| <i>fxr</i> -F                                    | GTGAACGACCACAAGTTTACCC | XM_003967283.2 | 166 |
| <i>fxr</i> -R                                    | AGACCAACAGATTACACCGGAT |                |     |
| <i>lxra</i> -F                                   | GTGACGCACCACTAACAGCA   | XM_011609917.1 | 191 |
| <i>lxra</i> -R                                   | CTGACAACACCGAGCAAGACT  |                |     |
| <i>hnf4a</i> -F                                  | GAGCCACGGGCAAACACTA    | XM_011619034.1 | 199 |

|                                        |                           |                   |     |
|----------------------------------------|---------------------------|-------------------|-----|
| <i>hnf4a</i> -R                        | AGGGTCCTACCTTCTTTCTTCAT   |                   |     |
| <i>lrh-1</i> -F                        | CGCTGACATGCTGCCTAAA       |                   |     |
| <i>lrh-1</i> -R                        | TCTCGTCCAAGTCTTCGTCAT     | XM_003974281.2    | 140 |
| Cholesterol and bile acid biosynthesis |                           |                   |     |
| <i>hmgcr</i> -F                        | GCTGCTGGCAATCAAGTACAT     |                   |     |
| <i>hmgcr</i> -R                        | AAACATACAACCTCCTTCCTACAGC | XM_003974466.2    | 143 |
| <i>cyp7a1</i> -F                       | CCTACCTGCTACCTTCTGGAGT    |                   |     |
| <i>cyp7a1</i> -R                       | TCCTCTTTGGCAACACGAA       | XM_003975521.2    | 237 |
| Reference gene                         |                           |                   |     |
| $\beta$ -actin-F                       | GAGAGGGAAATCGTGCGTGA      |                   |     |
| $\beta$ -actin-R                       | GAAGGATGGCTGGAAGAGGG      | XM_003964421.3    | 186 |
| <i>ef1a</i> -F                         | TTGGAGGCATTGGAAGTGT       |                   |     |
| <i>ef1a</i> -R                         | GTTGACGGGAGCAAAGGT        | NM_001037873.1    | 86  |
| Reference gene                         |                           |                   |     |
| $\beta$ -actin-F                       | GACGCAAAACCTCCGAAGT       |                   |     |
| $\beta$ -actin-R                       | CCTCCAAACGGATCAGCACA      | Gene ID 101079312 | 129 |
| EF1 $\alpha$ -F                        | TGGCCTTTAGCCGAATGAGG      |                   |     |
| EF1 $\alpha$ -R                        | TGTCGGGCCAATCAATCCAG      | Gene ID 653026    | 117 |

PL: product length; *acac $\beta$* : acetyl-CoA carboxylase beta; *fas*: fatty acid synthase; *cpt-1*: carnitine O-palmitoyltransferase-1; *vlcs*: very long-chain acyl-CoA synthetase; *acox1*: acyl-CoA oxidase 1, palmitoyl; *acox3*: acyl-CoA oxidase 3, pristanoyl; *ehhadh*: enoyl-CoA hydratase and 3-hydroxyacyl CoA dehydrogenase; *acaa*: acetyl-CoA acyltransferase; *dgat1*: diacylglycerol O-acyltransferase 1; *mgat2a*: 2-acylglycerol O-acyltransferase 2-A-like (LOC101069338); *atgl*: adipose triglyceride lipase (patatin like phospholipase domain containing 2 (*pnpla2*)); *dagla*: diacylglycerol lipase, alpha; *hsl*: hormone-sensitive lipase; *mgll*: monoglyceride lipase; *bsal*: bile acid activated lipase; *lp*: inactive pancreatic lipase-related protein 1-like (LOC101064949); *lpl*: lipoprotein lipase; *lipc*: lipase, hepatic; *fabp*: fatty acid binding protein; *fatp*: fatty acid transport protein (solute carrier family 27 member 1 (*slc27a1*)); *apo*: apolipoprotein; *mttp*: microsomal triglyceride transfer protein; *srebf1*: sterol regulatory element binding

transcription factor 1; *ppar*: peroxisome proliferators-activated receptor; *fxr*: farnesoid X receptor (nuclear receptor subfamily 1, group H, member 4, *nr1h4*); *lxra*: liver X receptor alpha (nuclear receptor subfamily 1, group H, member 3, *nr1h3*); *hnf4a*: hepatocyte nuclear factor 4, alpha; *lrh-1*: liver receptor homolog-1 (nuclear receptor subfamily 5, group A, member 2, *nr5a2*); *hmgcr*: 3-hydroxy-3-methylglutaryl-CoA reductase; *cyp7a1*: cholesterol 7-alpha-hydroxylase (cytochrome P450 7A1); CYTB: cytochrome B.

**Supplementary Table S2** Growth performance of experimental tiger puffer (mean ± standard error)

| Parameters   | FO-C                    | Graded FO replacement with BT |                        |                         | Alternate feeding between FO and BT |                         |                          | BT-C                     |
|--------------|-------------------------|-------------------------------|------------------------|-------------------------|-------------------------------------|-------------------------|--------------------------|--------------------------|
|              |                         | 25%                           | 50%                    | 75%                     | 1BT-1FO                             | 2BT-1FO                 | 3BT-1FO                  |                          |
| FBW (g)      | 75.5±1.36 <sup>ab</sup> | 68.9±1.07 <sup>a</sup>        | 68.7±0.67 <sup>a</sup> | 83.5±8.02 <sup>b</sup>  | 70.1±3.31 <sup>a</sup>              | 70.5±1.33 <sup>a</sup>  | 74.0±3.10 <sup>ab</sup>  | 75.6±4.26 <sup>ab</sup>  |
| FER          | 0.71±0.03 <sup>bc</sup> | 0.54±0.03 <sup>bc</sup>       | 0.36±0.09 <sup>a</sup> | 0.78±0.18 <sup>c</sup>  | 0.62±0.03 <sup>abc</sup>            | 0.43±0.14 <sup>ab</sup> | 0.61±0.05 <sup>abc</sup> | 0.65±0.06 <sup>abc</sup> |
| WG (%)       | 628±11.3 <sup>a</sup>   | 574±8.89 <sup>ab</sup>        | 572±5.62 <sup>a</sup>  | 696±66.9 <sup>b</sup>   | 583±27.6 <sup>a</sup>               | 587±11.1 <sup>a</sup>   | 616±25.8 <sup>ab</sup>   | 630±35.5 <sup>ab</sup>   |
| Survival (%) | 59.1±4.76 <sup>bc</sup> | 40.0±0.00 <sup>ab</sup>       | 32.4±6.87 <sup>a</sup> | 48.6±1.65 <sup>bc</sup> | 38.1±0.95 <sup>ab</sup>             | 30.5±5.30 <sup>a</sup>  | 45.7±4.36 <sup>abc</sup> | 50.5±8.30 <sup>bc</sup>  |

Data in a same row sharing same superscript letters are not significantly different ( $P>0.05$ ). FBW: final body weight; FER: feed efficiency ratio; WG: weight gain.

**Supplementary Table S3** Lipid metabolism-related biochemical parameters in the serum (mean ± standard error)

| Parameters                    | FO-C                    | Graded FO replacement with BT |                         |                         | Alternate feeding between FO and BT |                         |                         | BT-C                    |
|-------------------------------|-------------------------|-------------------------------|-------------------------|-------------------------|-------------------------------------|-------------------------|-------------------------|-------------------------|
|                               |                         | 25%                           | 50%                     | 75%                     | 1BT-1FO                             | 2BT-1FO                 | 3BT-1FO                 |                         |
| TG (mmol L <sup>-1</sup> )    | 0.76±0.02 <sup>d</sup>  | 0.58±0.02 <sup>b</sup>        | 0.58±0.00 <sup>b</sup>  | 0.58±0.02 <sup>b</sup>  | 0.65±0.02 <sup>c</sup>              | 0.50±0.00 <sup>a</sup>  | 0.55±0.01 <sup>b</sup>  | 0.57±0.01 <sup>b</sup>  |
| HDL-C (mmol L <sup>-1</sup> ) | 0.77±0.10 <sup>bc</sup> | 1.05±0.15 <sup>d</sup>        | 0.37±0.01 <sup>ab</sup> | 0.29±0.04 <sup>a</sup>  | 0.58±0.10 <sup>b</sup>              | 0.13±0.01 <sup>a</sup>  | 0.64±0.09 <sup>b</sup>  | 0.92±0.04 <sup>cd</sup> |
| LDL-C (mmol L <sup>-1</sup> ) | 3.08±0.10 <sup>ab</sup> | 2.97±0.09 <sup>a</sup>        | 4.31±0.27 <sup>c</sup>  | 3.27±0.20 <sup>ab</sup> | 3.01±0.13 <sup>ab</sup>             | 3.53±0.20 <sup>b</sup>  | 3.21±0.12 <sup>ab</sup> | 3.12±0.09 <sup>ab</sup> |
| TBA (μmol L <sup>-1</sup> )   | 0.46±0.03 <sup>a</sup>  | 0.49±0.03 <sup>a</sup>        | 0.64±0.01 <sup>b</sup>  | 0.53±0.03 <sup>ab</sup> | 0.57±0.04 <sup>ab</sup>             | 0.57±0.04 <sup>ab</sup> | 0.60±0.05 <sup>b</sup>  | 0.53±0.04 <sup>ab</sup> |
| TC (mmol L <sup>-1</sup> )    | 4.83±0.20 <sup>ab</sup> | 4.72±0.18 <sup>ab</sup>       | 5.30±0.29 <sup>b</sup>  | 4.17±0.26 <sup>a</sup>  | 4.31±0.19 <sup>a</sup>              | 4.25±0.19 <sup>a</sup>  | 4.42±0.08 <sup>a</sup>  | 4.83±0.07 <sup>ab</sup> |

Data in a same row sharing same superscript letters are not significantly different ( $P>0.05$ ). TG: triacylglycerol; HDL-C: high-density lipoprotein cholesterol; LDL-C: low-density lipoprotein cholesterol; TBA: total bile acid; TC: total cholesterol. The concentration of these parameters in serum were measured with commercial kits supplied by Nanjing Jiancheng Bioengineering Institute (Nanjing, China).

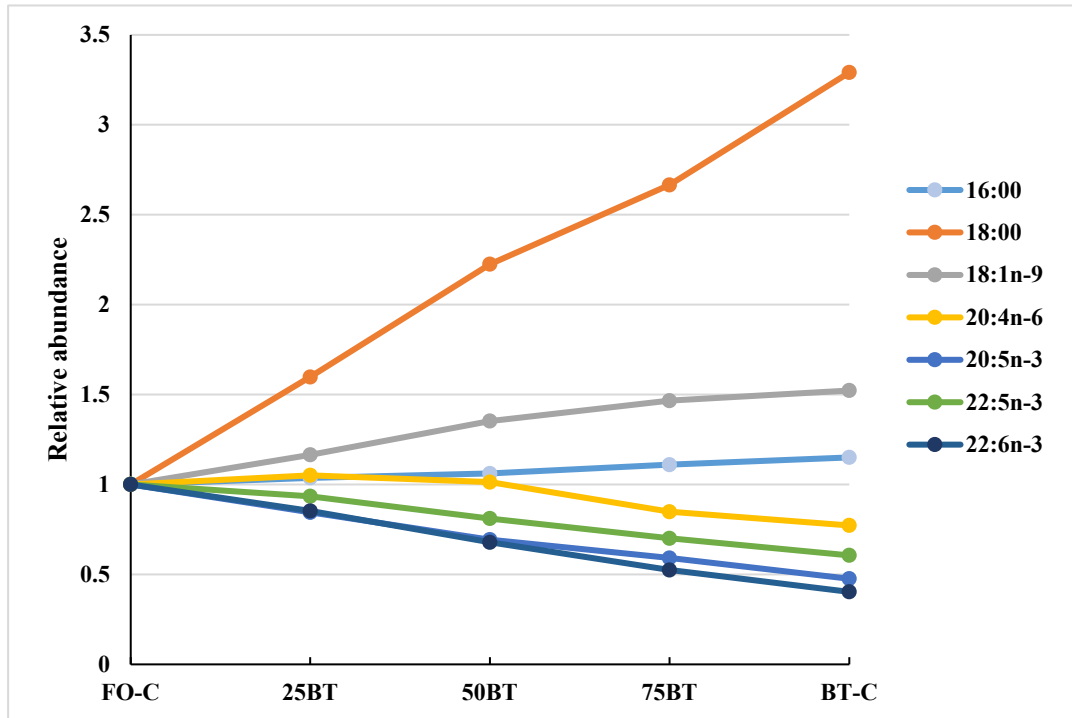

**Supplementary Figure S1** Relative abundance of main fatty acids in experimental diets. The fatty acid contents in group FO-C were normalized to be 1.

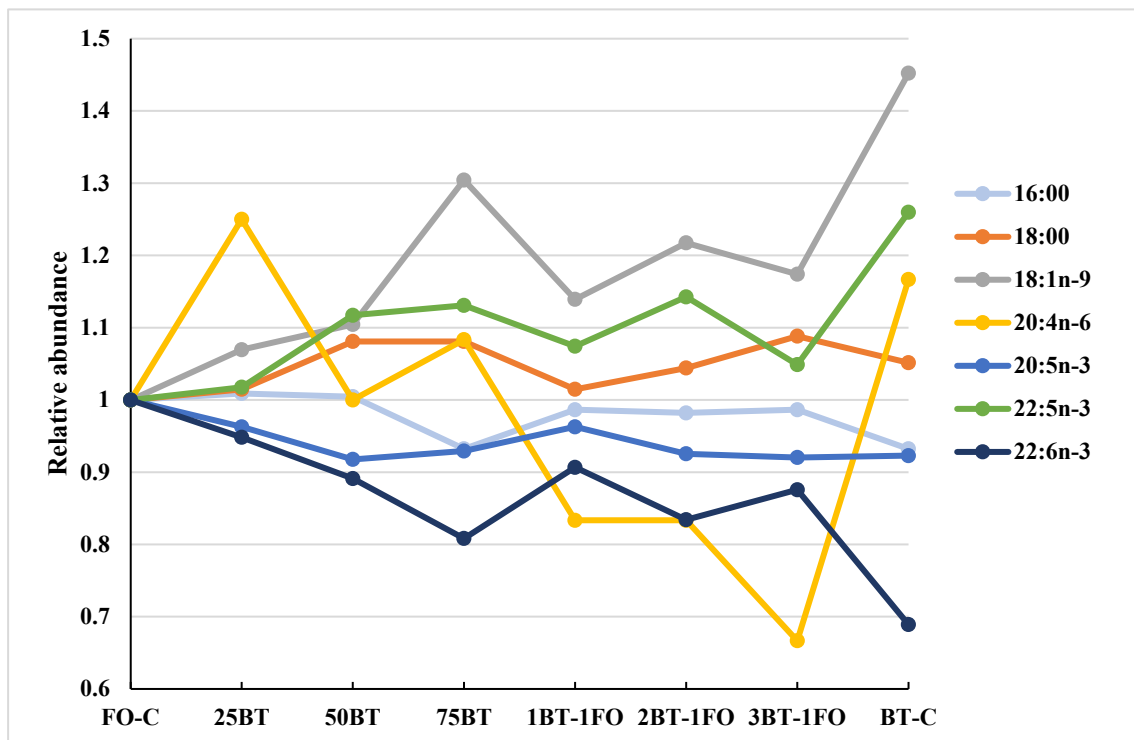

**Supplementary Figure S2** Relative abundance of main fatty acids in the muscle of juvenile tiger puffer. The fatty acid contents in group FO-C were normalized to be 1.



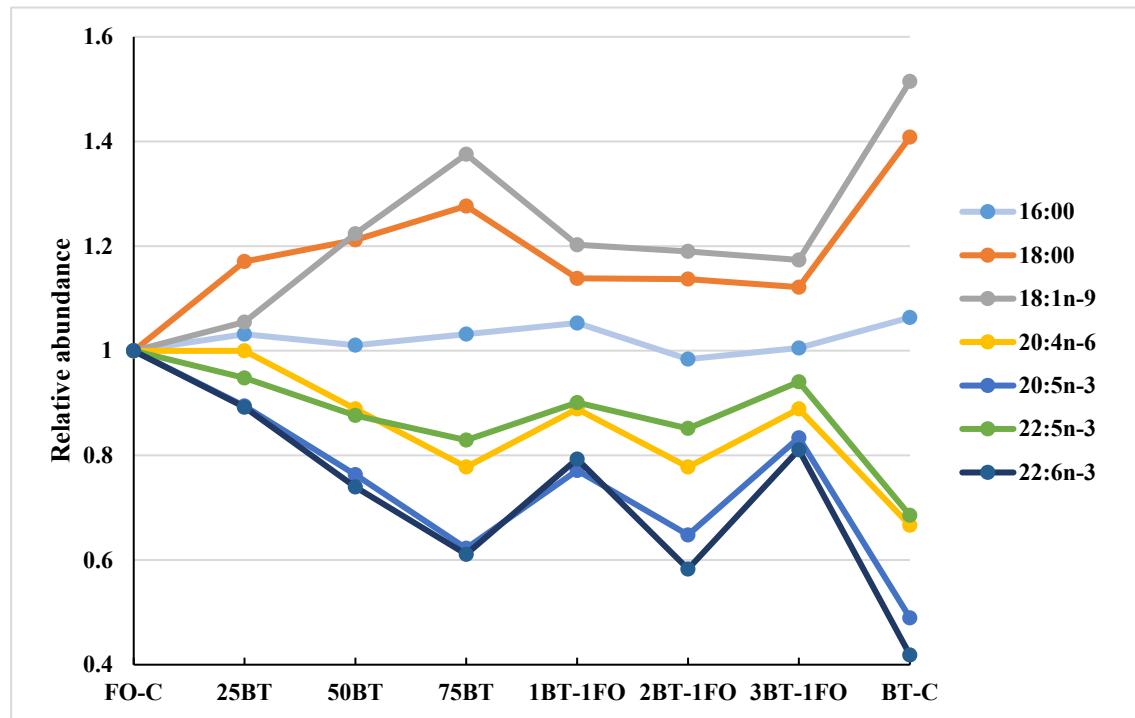

**Supplementary Figure S3** Relative abundance of main fatty acids in the liver of juvenile tiger puffer. The fatty acid contents in group FO-C were normalized to be 1.
